# Supplementary material for: The enzymatic performance derived from the lattice planes of Ir nanoparticles
Source: Royal Society of Chemistry journal article supplement (doi:10.1039/d1cy01775f), 2021-12-20
Supplement: d1cy01775f1.pdf [file d1cy01775f1.pdf]

## Supplementary Information

### **The enzymatic performance derived from the lattice planes of Ir nanoparticles**

Guangxia Jin<sup>&</sup>, Guowei Sun<sup>&</sup>, Cheng Fu, Chan Wang, Guoxia Ran and Qijun Song\*

Key Laboratory of Synthetic and Biological Colloids, Ministry of Education,  
School of Chemical and Material Engineering, Jiangnan University, 1800 Lihu  
Road, Wuxi, Jiangsu Province 214122, P. R. China

<sup>&</sup> Co-first Author.

\* Corresponding Author. E-mail address: [qsong@jiangnan.edu.cn](mailto:qsong@jiangnan.edu.cn) (Qijun Song)

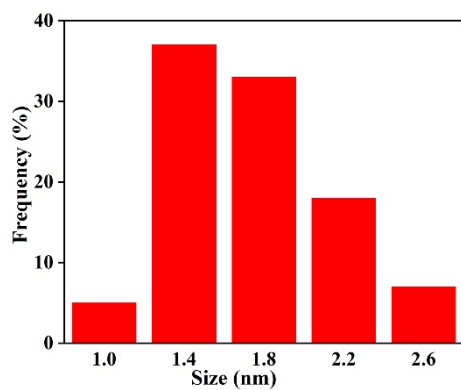

Fig.S1 Particle size distributions of CD-IrNPs

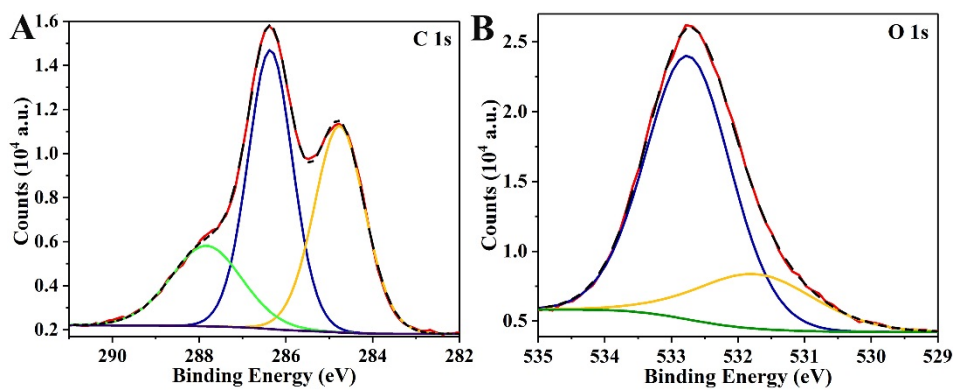

Fig.S2 High-resolution XPS survey scan of C1s (A) and O1s (B) of CD-IrNPs.

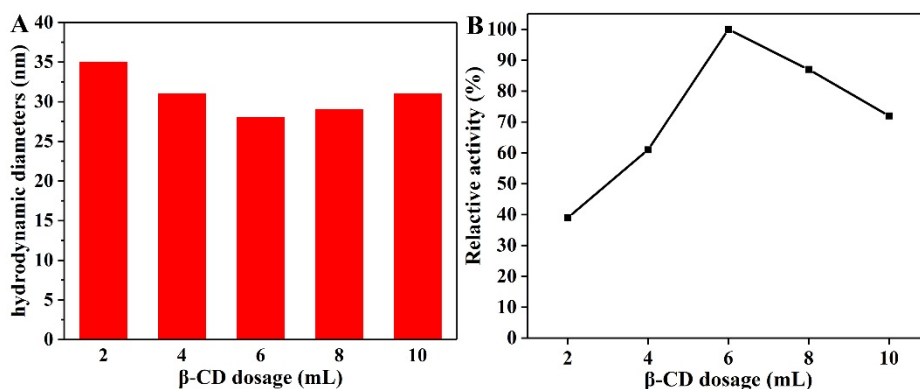

Fig.S3 (A) The average hydrodynamic diameters of the CD-IrNPs prepared from different amount of  $\beta$ -CD. (B) Dependency of the IrNPs oxidase-like activity on the  $\beta$ -CD dosage.

The average hydrodynamic diameters are 35, 31, 28, 29 and 31 nm respectively when the amount of  $\beta$ -CD was varied from 2 mL to 10 mL in the IrNPs preparation process. When the molar ratio of  $\text{Ir}^{3+}$  to  $\beta$ -CD was 1:5.1, the catalytic activity of IrNPs was the highest among all the tested ratios. Therefore, the amount of 6 mL 34 mM  $\beta$ -CD was chosen in the synthesis of CD-IrNPs.

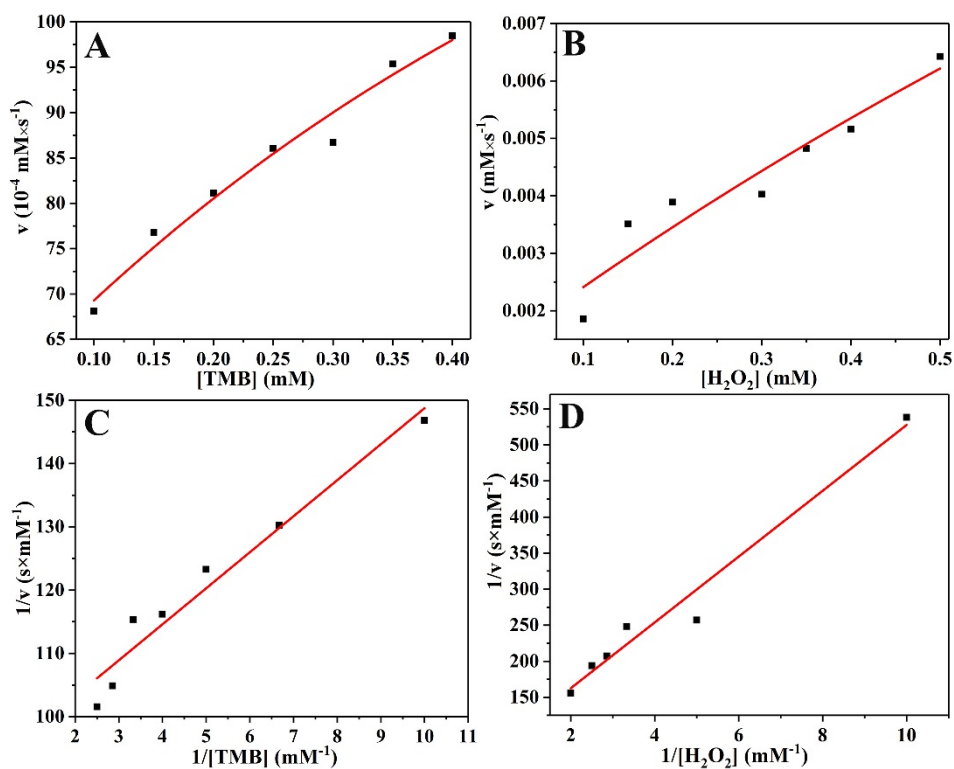

Fig.S4 Steady state kinetic assay of peroxidase-like activity of CD-IrNPs in Hac-HAc buffer (0.01 M, pH 3.86) at room temperature. (A) The  $\text{H}_2\text{O}_2$  concentration was 0.5 mM and TMB was varied. (B) TMB concentration was fixed at 0.5 mM and  $\text{H}_2\text{O}_2$  was varied. (C, D) were double-reciprocal plots of activity of CD-IrNPs, corresponding to (A) and (B).

The  $K_m$  and  $v_{\text{max}}$  values of CD-IrNPs when choosing TMB as substance were calculate to be 0.0619 mM and 0.011 mM/s, respectively. And the values were 0.64 mM and 0.014 mM/s when choosing  $\text{H}_2\text{O}_2$  as substrate.

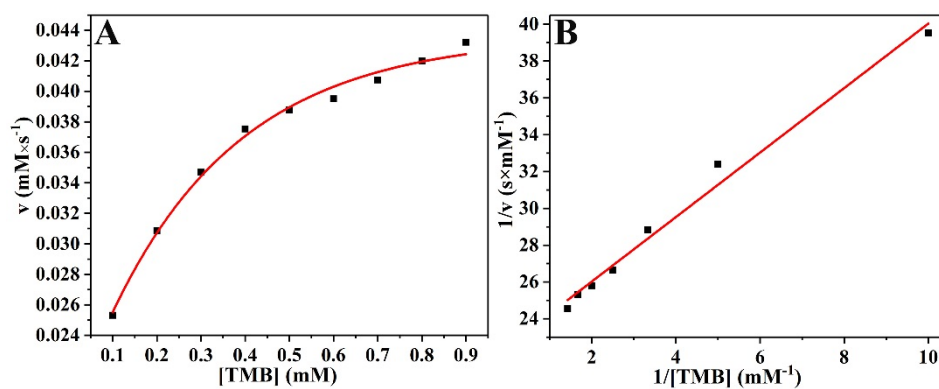

Fig.S5 (A) Steady state kinetic assay of oxidase-like activity of CD-IrNPs in HAc-NaAc buffer (0.01 M, pH 3.86) versus varying concentration of TMB at room temperature. (B) Double-reciprocal plots of oxidase-like activity of CD-IrNPs. Accordingly, the  $K_m$  and  $v_{\max}$  of CD-IrNPs were calculated to be 0.082 mM and 0.045 mM/s, respectively.

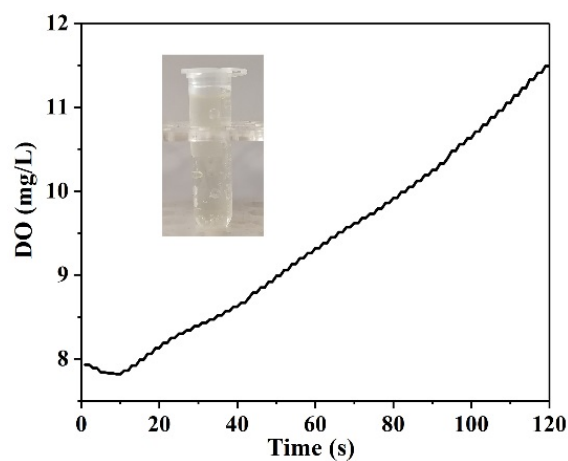

Fig.S6 Dissolved oxygen generation catalyzed by TA-IrNPs. Reaction conditions: 30  $\mu\text{L}$ , 3 mg/mL TA-IrNPs were incubated in 5 mM  $\text{H}_2\text{O}_2$  solution for minutes at room temperature.

Table S1. The enzyme mimic properties of different IrNPs

|           | crystal plane |       |       |            | catalytic activity       |                              |                           |
|-----------|---------------|-------|-------|------------|--------------------------|------------------------------|---------------------------|
|           | (111)<br>)    | (200) | (220) | (311)<br>) | oxidase-like<br>activity | peroxidase-<br>like activity | catalase-like<br>activity |
| TA-IrNPs  | ✓             |       |       |            |                          | ✓                            | ✓                         |
| PVP-IrNPs | ✓             |       |       |            |                          | ✓                            | ✓                         |
| Cit-IrNPs | ✓             | ✓     | ✓     | ✓          | ✓                        | ✓                            | ✓                         |
| CD-IrNPs  | ✓             |       | ✓     |            | ✓                        | ✓                            | ✓                         |

Table S2. Calculated energy of adsorption for oxygen at different crystal faces and distance d between adsorb ate and surface.

| site  | $\Delta E_{ad}$ (eV) | d (Å) |
|-------|----------------------|-------|
| (111) | -2.33                | 1.98  |
| (200) | -2.88                | 1.96  |
| (220) | -3.41                | 1.96  |
| (311) | -3.38                | 1.94  |

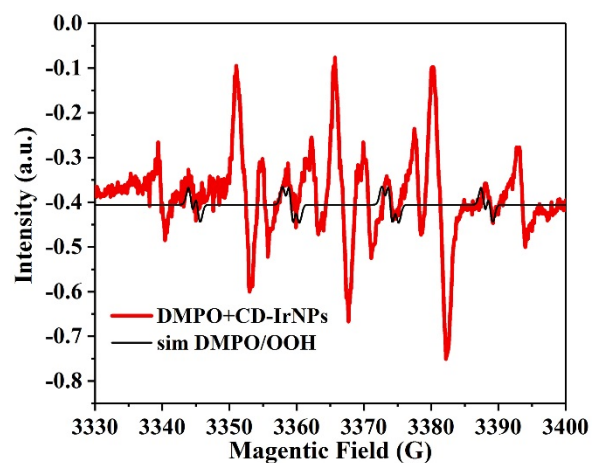

Fig.S7 ESR spectrum of CD-IrNPs/DMPO sample (red line) and the simulated DMPO/ $\cdot$ OOH spectrum (black line).

In the ESR tests, an amount of 100  $\mu$ L CD-IrNPs aqueous suspension (3 mg/mL) and 20  $\mu$ L of DMPO was mixed with 0.5 mL of H<sub>2</sub>O. The mixed solution was monitored by ESR spectrometer immediately.

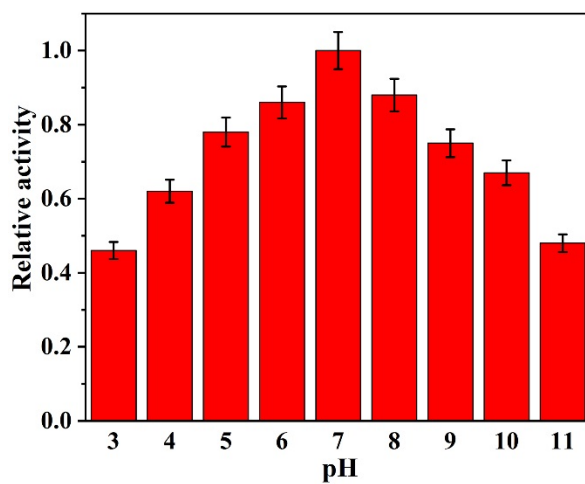

Fig.S8 Effect of pH on the catalase-like activity of CD-IrNPs.

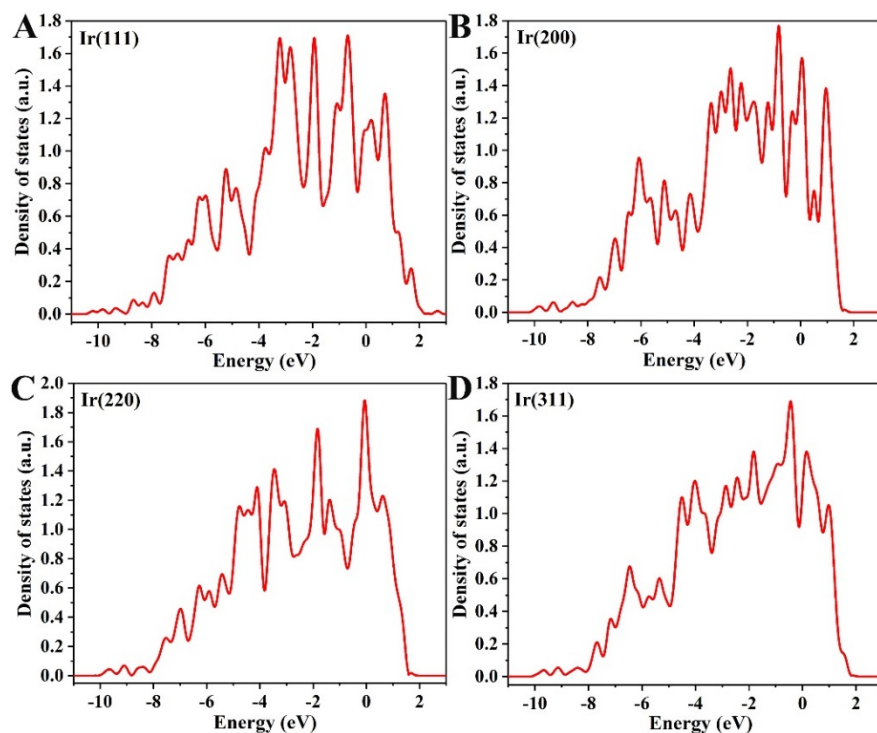

Fig.S9 DOS projections onto states for Ir atoms on Ir(111) plane (A), Ir(200) plane (B), Ir(220) plane (C) and Ir(311) plane (D).

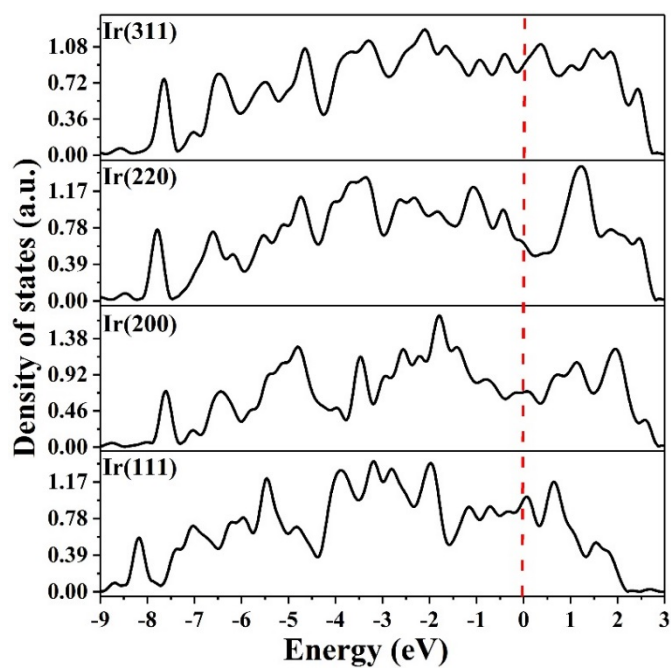

Fig.S10 DOS projections onto states for Ir atom on different Ir lattice planes after interact with  $\cdot\text{OOH}$ .
